# Supplementary material
Source: Research Square preprint supplement (doi:10.21203/rs.3.rs-10015703/v1)
Supplement: Supplementary file 1 [file c709270dc2ca783fe66fa69f.docx]

**Supplementary File 1** **Interview Guide**

**Study Title:** Family Resilience in the Face of Short-Term War Trauma: A Phenomenological Study of Iranian Urban Families' Lived Experiences During the 12-Day Iran-Israel Conflict

**Semi-structured Interview Guide**

**Opening statement:** Thank you for agreeing to participate in this study. The interview will last approximately 60–90 minutes. You can stop at any time, and all information will remain confidential.

**Main Questions:**

1. Can you walk me through a typical day for your family during the 12-day Iran-Israel conflict?
2. What was the experience of hearing missile explosions and air defense sirens like for you and your family?
3. How did the internet blackouts affect your family's communication, sense of safety, and relationships?
4. What were your greatest worries during those days, and how did your family manage the uncertainty?
5. Looking back, what helped your family cope — or even grow stronger — during and after this period?

**Probing questions (used as needed):**

- Can you tell me more about that?
- How did that make you feel?
- How did other family members respond?
- What changed in your family relationships during that time?
- Is there anything else you would like to share about your experience?

**Closing:** Thank you very much for sharing your experiences. Do you have any final thoughts?
